# Supplementary material for: Diaphragm ultrasound as indicator of respiratory effort in critically ill patients undergoing assisted mechanical ventilation: a pilot clinical study
Source: Springer Nature journal article supplement (doi:10.1186/s13054-015-0894-9), 2015-03-29
Supplement: MOESM1 [file 9780398]

# **Diaphragm ultrasound as indicator of respiratory effort in critically ill patients undergoing assisted mechanical ventilation: a pilot clinical study**

Michele Umbrello<sup>a</sup>, Paolo Formenti<sup>a</sup>, Daniela Longhi<sup>b</sup>, Andrea Galimberti<sup>b</sup>, Ilaria Piva<sup>b</sup>, Angelo Pezzi<sup>a</sup>, Giovanni Mistraletti<sup>a,b</sup>, John J. Marini<sup>c</sup>, Gaetano Iapichino<sup>a,b</sup>.

From the: <sup>a</sup>Unità Operativa di Anestesia e Rianimazione, Azienda Ospedaliera San Paolo - Polo Universitario, Milano; <sup>b</sup>Dipartimento di Fisiopatologia Medico-Chirurgica e dei Trapianti, Università degli Studi di Milano; <sup>c</sup> Department of Pulmonary and Critical Care, University of Minnesota, Regions Hospital, St Paul, MN, USA

## **Corresponding author and address for reprints:**

Michele Umbrello, MD

UO Anestesia e Rianimazione

A.O. San Paolo - Polo Universitario

Via A. Di Rudinì, 8 - 20142 Milano - Italy

Email [michele.umbrello@ao-sanpaolo.it](mailto:michele.umbrello@ao-sanpaolo.it)

Table S1 – Intraobserver reliability of ultrasonographic measurements of diaphragm function

**End Inspiratory diaphragmatic thickness (cm)**

| Observer | Mean  | Range      | IntraCC | Repeatability coeff (cm) |
|----------|-------|------------|---------|--------------------------|
| 1 (D.L.) | 0.395 | 0.16; 0.59 | 0.877   | 0.041                    |
| 2 (A.G.) | 0.396 | 0.18; 0.57 | 0.876   | 0.039                    |

**End Expiratory diaphragmatic thickness (cm)**

| Observer | Mean  | Range      | IntraCC | Repeatability coeff (cm) |
|----------|-------|------------|---------|--------------------------|
| 1 (D.L.) | 0.282 | 0.15; 0.45 | 0.985   | 0.030                    |
| 2 (A.G.) | 0.280 | 0.17; 0.43 | 0.986   | 0.020                    |

**Thickening fraction (%)**

| Observer | Mean | Range | IntraCC | Repeatability coeff (%) |
|----------|------|-------|---------|-------------------------|
| 1 (D.L.) | 42.4 | 3; 84 | 0.986   | 10.6                    |
| 2 (A.G.) | 44.5 | 2; 83 | 0.990   | 8.89                    |

**Respiratory diaphragmatic displacement (cm)**

| Observer | Mean | Range      | IntraCC | Repeatability coeff (cm) |
|----------|------|------------|---------|--------------------------|
| 1 (D.L.) | 1.97 | 0.80; 3.18 | 0.998   | 0.080                    |
| 2 (A.G.) | 1.91 | 0.74; 3.18 | 0.999   | 0.068                    |

IntraCC: Intra-class correlation coefficient; Repeatability coeff: repeatability coefficient

**Table S2 - Interobserver reliability of ultrasonographic measurements of diaphragm function**

**End Inspiratory diaphragmatic thickness (cm)**

| Mean | Range      | InterCC | Repeatability<br>coefficient (cm) | Difference between the two observers |               |
|------|------------|---------|-----------------------------------|--------------------------------------|---------------|
|      |            |         |                                   | Mean                                 | 95% CI        |
| 0.39 | 0.17; 0.58 | 0.965   | 0.065                             | -0.001                               | -0.081; 0.079 |

**End Expiratory diaphragmatic thickness (cm)**

| Mean | Range      | InterCC | Repeatability<br>coefficient (cm) | Difference between the two observers |               |
|------|------------|---------|-----------------------------------|--------------------------------------|---------------|
|      |            |         |                                   | Mean                                 | 95% CI        |
| 0.28 | 0.16; 0.43 | 0.989   | 0.023                             | -0.006                               | -0.113; 0.001 |

**Thickening fraction (%)**

| Mean | Range     | InterCC | Repeatability<br>coefficient (%) | Difference between the two observers |             |
|------|-----------|---------|----------------------------------|--------------------------------------|-------------|
|      |           |         |                                  | Mean                                 | 95% CI      |
| 41.5 | 4.6; 82.1 | 0.936   | 17.9                             | 0.89                                 | -4.58; 6.36 |

**Respiratory diaphragmatic displacement (cm)**

| Mean | Range      | InterCC | Repeatability<br>coefficient (%) | Difference between the two observers |             |
|------|------------|---------|----------------------------------|--------------------------------------|-------------|
|      |            |         |                                  | Mean                                 | 95% CI      |
| 1.94 | 0.77; 3.18 | 0.988   | 0.256                            | 0.065                                | -0.48; 0.62 |

InterCC: Inter-class correlation coefficient;; 95% CI: 95% confidence interval
